# Supplementary material
Source: MDPI journal article supplement (https://www.mdpi.com/2311-5637/7/2/64)
Supplement: s1 [file s1]

*Table S1.* Enological characteristics of Chardonnay (CH) and Xarel.lo (XA) base wines, fermented by the addition of *S. cerevisiae* (Y1, Y2, Y3) and non-*Sacharomyces* (Y4, Y5). Glucose and fructose (Glu+Fru, mg/L), **total acidity (TA, expressed in g/L of tartaric acid)**, pH and malic acid (mg/L). Different letters indicate significant differences between samples with different yeasts for each grape variety. Samples (n=2).

| CH         | Y1            | Y2             | Y3            | Y4            | Y5            |
|------------|---------------|----------------|---------------|---------------|---------------|
| Glu+Fru    | 0.05 a ± 0.05 | 0.22 ab ± 0.03 | 0.40 c ± 0.06 | 0.11 a ± 0.01 | 0.11 a ± 0.10 |
| <b>TA</b>  | 7.9 a ± 0.0   | 8.4 b ± 0.1    | 8.4 b ± 0.1   | 8.2 b ± 0.6   | 7.4 a ± 0.0   |
| pH         | 3.5 a ± 0.0   | 3.5 a ± 0.1    | 3.5 a ± 0.0   | 3.5 a ± 0.0   | 3.5 a ± 0.0   |
| Malic acid | 5.3 a ± 0.1   | 5.3 a ± 0.0    | 5.5 b ± 0.0   | 5.5 b ± 0.0   | 5.5 b ± 0.0   |
| XA         | Y1            | Y2             | Y3            | Y4            | Y5            |
| Glu+Fru    | 0.27 b ± 0.16 | 0.16 a ± 0.11  | 0.31 c ± 0.08 | 0.21 b ± 0.16 | 0.04 a ± 0.01 |
| <b>TA</b>  | 6.1 b ± 0.1   | 6.3 b ± 0.0    | 6.2 b ± 0.0   | 5.3 a ± 0.0   | 5.4 a ± 0.1   |
| pH         | 3.1 a ± 0.0   | 3.1 a ± 0.0    | 3.2 a ± 0.0   | 3.2 a ± 0.0   | 3.1 a ± 0.0   |
| Malic acid | 1.6 c ± 0.0   | 1.6 c ± 0.0    | 1.4 b ± 0.0   | 1.4 b ± 0.0   | 1.2 a ± 0.0   |
